# Supplementary material for: Facile synthesis of cyclic RAFT agents and ring expansion radical polymerization of vinyl monomers having cyclic topology
Source: Royal Society of Chemistry journal article supplement (doi:10.1039/d4py00031e), 2024-01-01
Supplement: d4py00031e1.pdf [file d4py00031e1.pdf]

## Facile Synthesis of Cyclic RAFT Agents and Ring Expansion Radical Polymerization of Vinyl Monomers Having Cyclic Topology

Hiroki Ito, Kota Oto, Akinori Takasu\* , Masahiro Higuchi

Department of Life Science and Applied Chemistry,

Graduate School of Engineering, Nagoya Institute of Technology,

Gokiso-cho, Showa-ku, Nagoya 466-8555, Japan

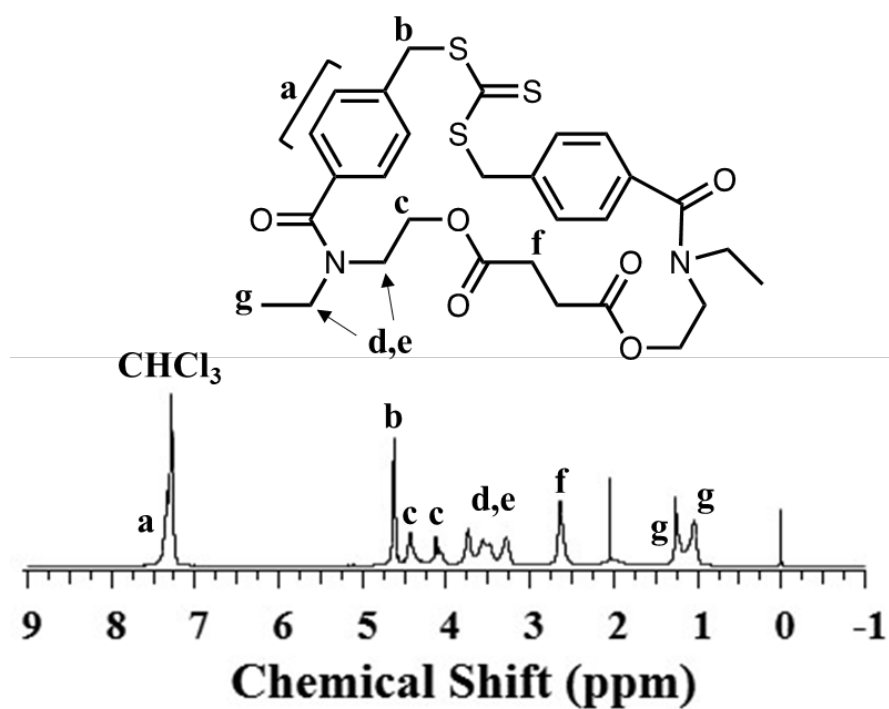

Figure S1. <sup>1</sup>H-NMR spectrum of cyclic-TTC prepared in chloroform-*d*.

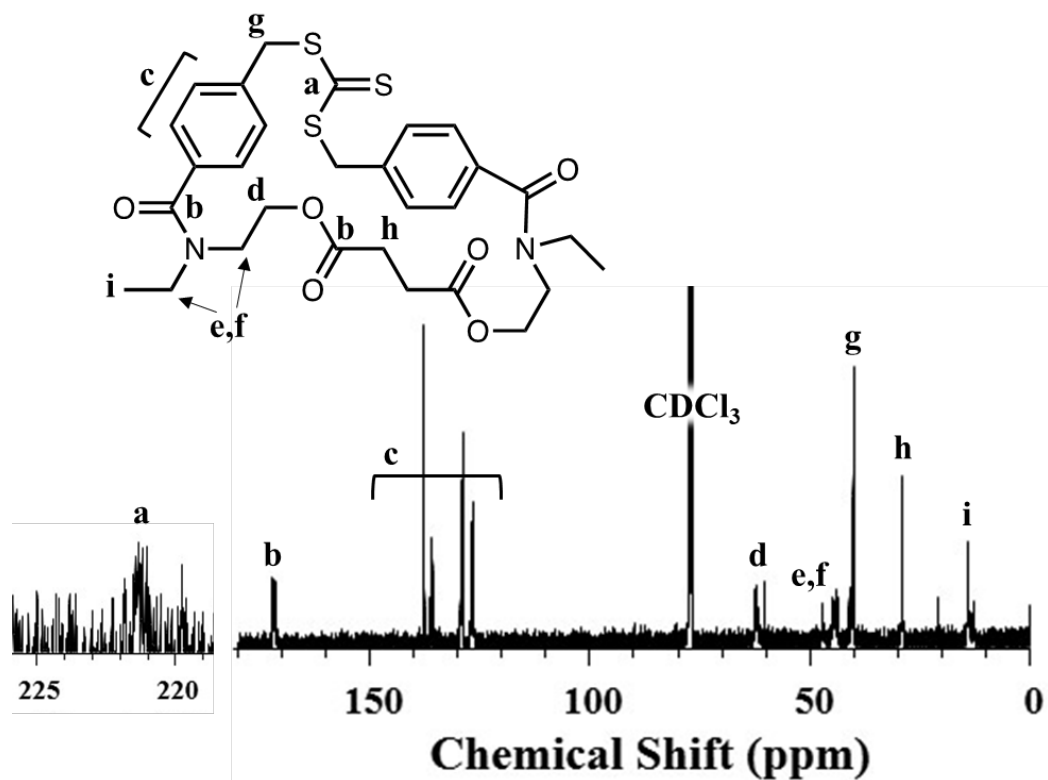

**Figure S2.**  $^{13}\text{C}$ -NMR spectrum of cyclic-TTC prepared in chloroform-*d*.

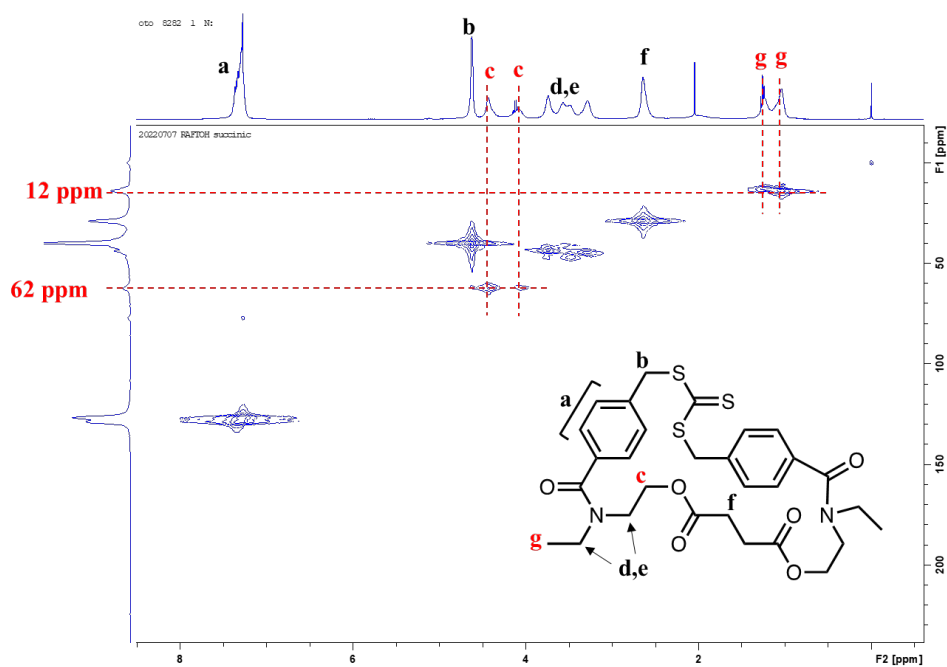

**Figure S3.** HMQC spectrum of cyclic-TTC prepared in chloroform-*d*.

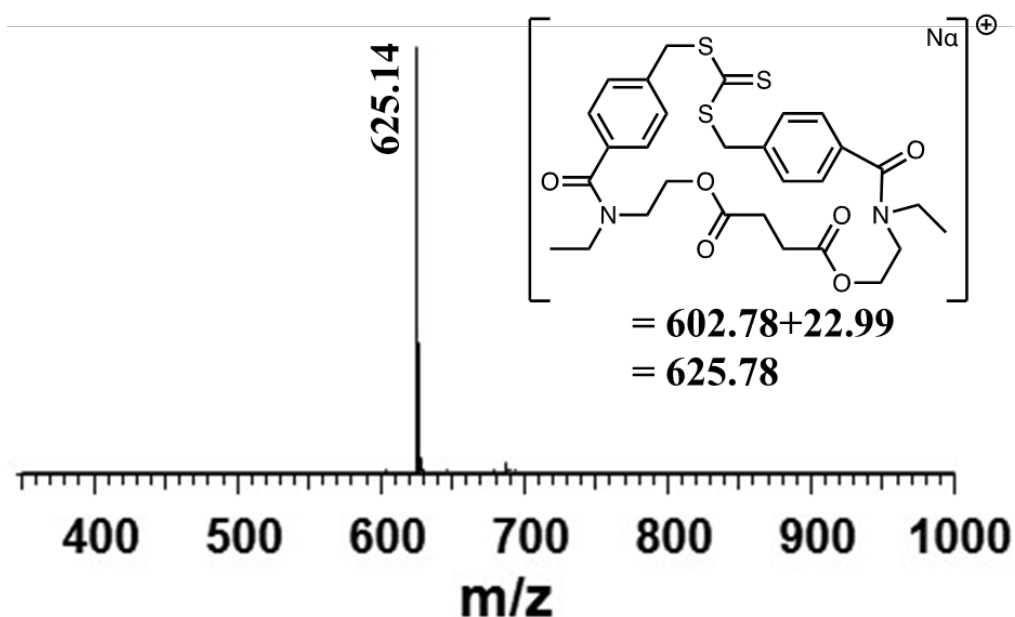

**Figure S4.** ESI-MS spectrum of cyclic-TTC.

**Table S1. RAFT Polymerization of *n*-BA Monomer via Dihydroxy-TTC.<sup>a</sup>**

| run            | [M] <sub>0</sub> /[dihydroxy-TTC] | [M] <sub>0</sub> (mol/L) | Time (h) | Conv <sup>b</sup> (%) | <i>M</i> <sub>p</sub> <sup>c</sup> (kg/mol) | <i>M</i> <sub>w</sub> / <i>M</i> <sub>n</sub> <sup>c</sup> |
|----------------|-----------------------------------|--------------------------|----------|-----------------------|---------------------------------------------|------------------------------------------------------------|
| 1 <sup>d</sup> | 100 / 1                           | 2.0                      | 6        | 53                    | 7.62                                        | 1.33                                                       |
| 2 <sup>e</sup> | 100 / 1                           | 0.67                     | 3        | 86                    | 9.00                                        | 1.56                                                       |
| 3 <sup>e</sup> | 100 / 1                           | 2.0                      | 3        | 97                    | 14.7                                        | 1.31                                                       |

<sup>a</sup>Reaction temperature = r. t., in DMF (deoxidized).

<sup>b</sup>Monomer conversion measured by <sup>1</sup>H NMR in CDCl<sub>3</sub>.

<sup>c</sup>Determined by SEC with a standard series of poly(styrene)s.

<sup>d</sup>Polymerization without radical initiator under UV irradiation.

<sup>e</sup>Polymerization using Ir(ppy)<sub>3</sub> as a redox catalyst without radical initiator under blue-LED irradiation.

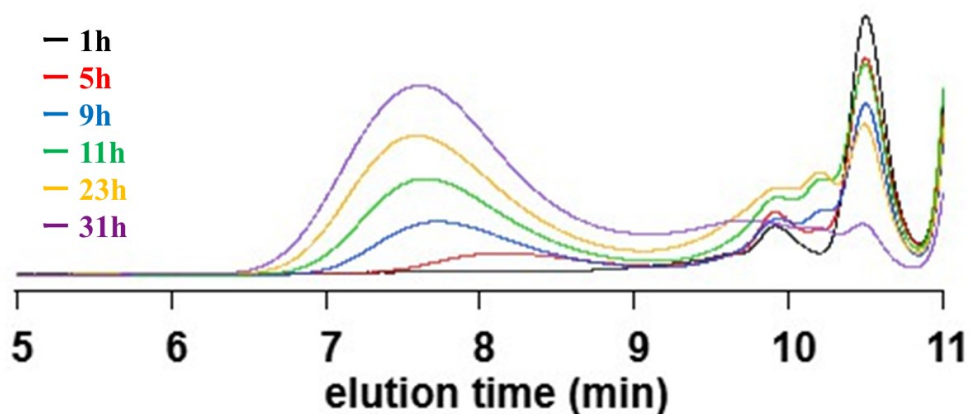

**Figure S5.** SEC traces of poly(*n*-BA)s (black line = 1 h, red line = 5 h, blue line = 9 h, yellow line = 23 h, violet line = 31 h) (run 3 in Table 2).

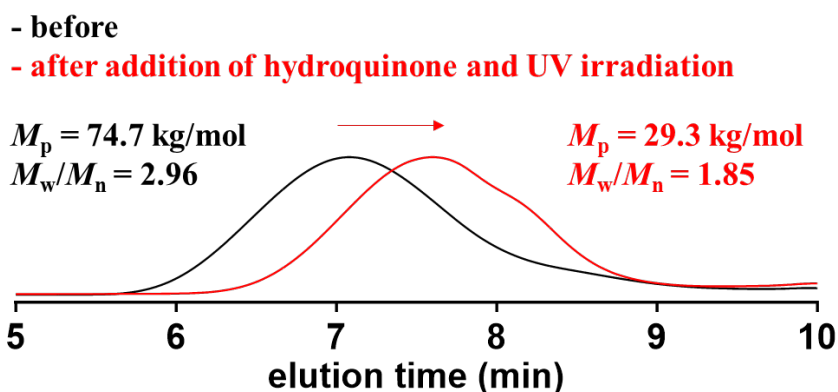

**Figure S6.** SEC trace of poly(*n*-BA)s (black line = before addition of hydroquinone and UV irradiation, red line = before addition of hydroquinone and UV irradiation).

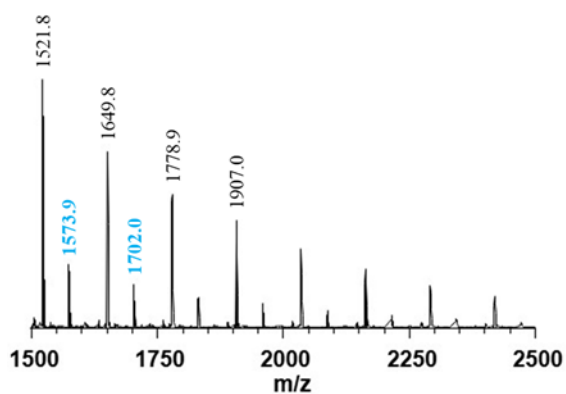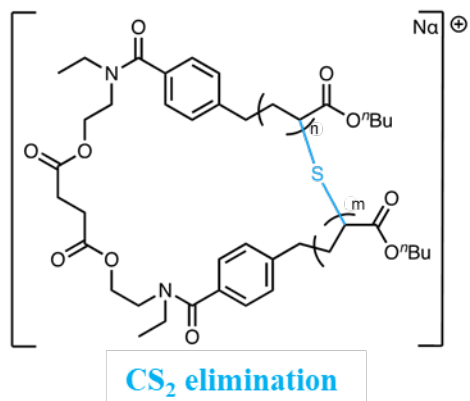

**Figure S7.** MALDI-TOF mass spectrum of poly(*n*-BA) synthesized with 2.0 M monomer concentration under UV irradiation (run 3 in Table 2).

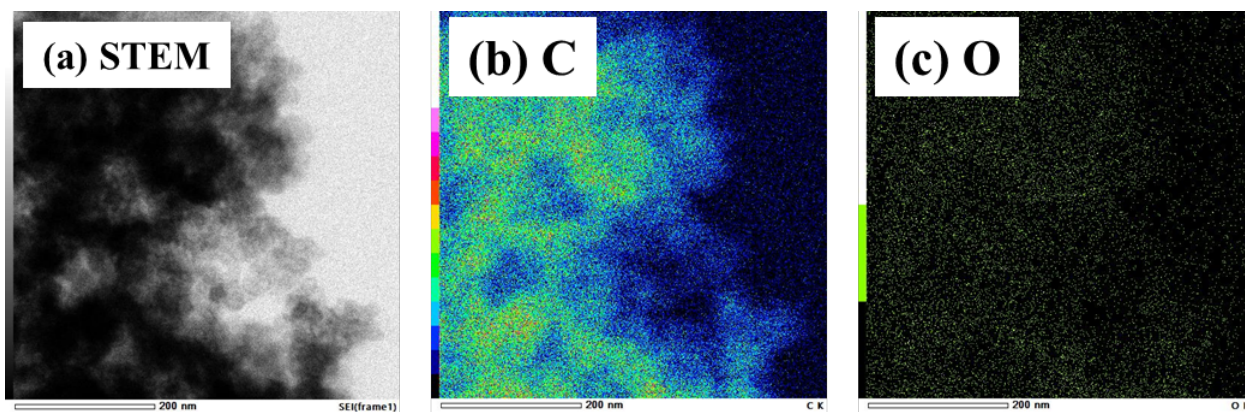

**Figure S8.** EDS mapping of poly(*n*-BA) (run 3 in Table 2). (a) STEM image, (b) carbon, (c) oxygen

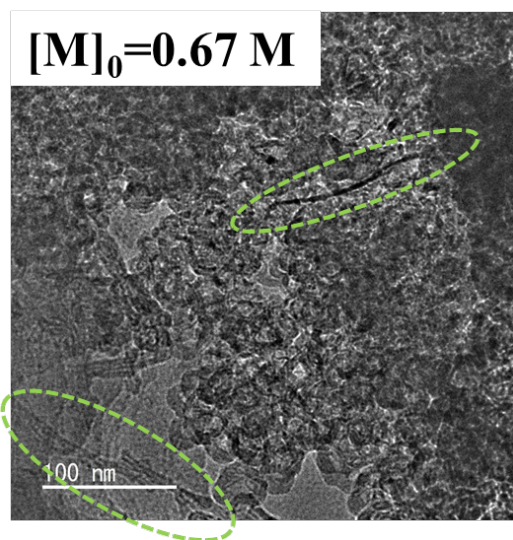

**Figure S9.** TEM observation of cyclic and linear poly(*n*-BA)s (run 1 in Table 2) prepared from toluene solution at 1.0  $\mu\text{g/mL}$ .

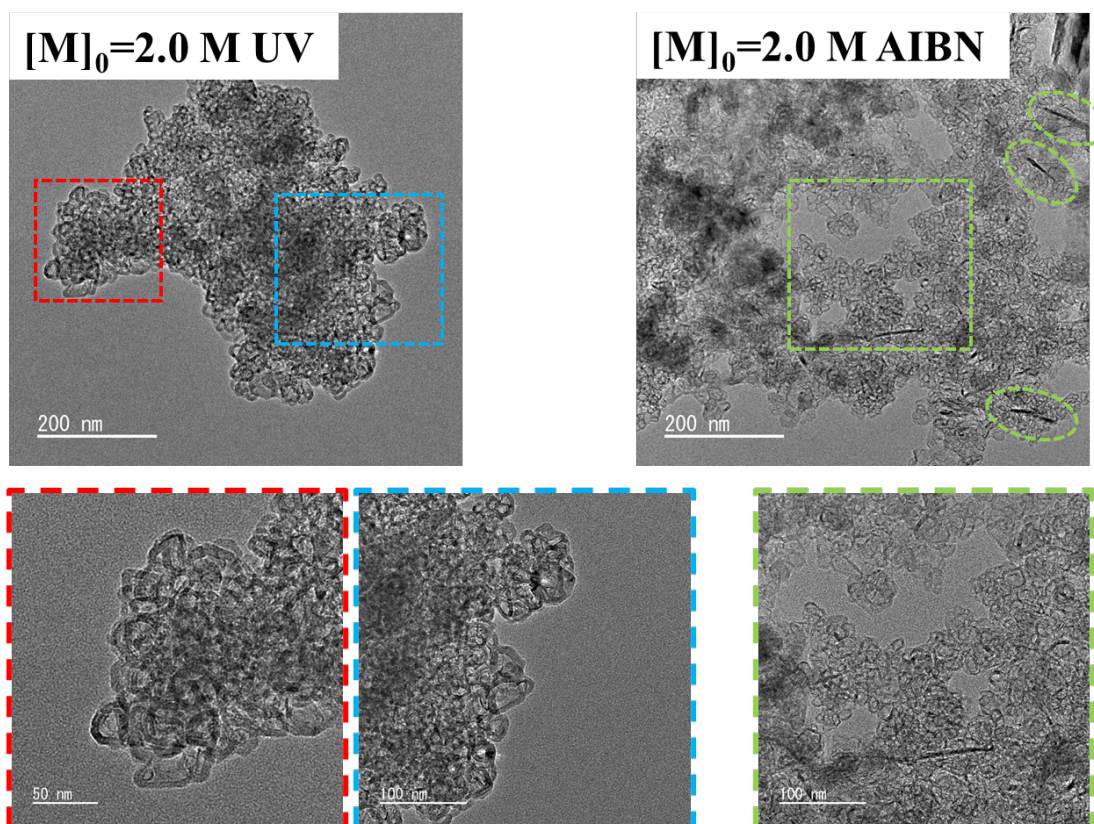

**Figure S10.** TEM observation of cyclic and linear poly(*n*-BA)s (run 2, 4 in Table 2) prepared from toluene solution at 1.0  $\mu\text{g/mL}$ .

[Cyclic-TTC]<sub>0</sub>=6.7 mM

- before

- after aminolysis

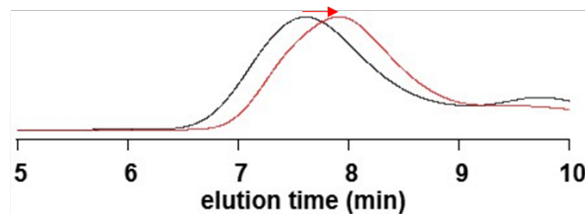

[Cyclic-TTC]<sub>0</sub>=20 mM

- before

- after aminolysis

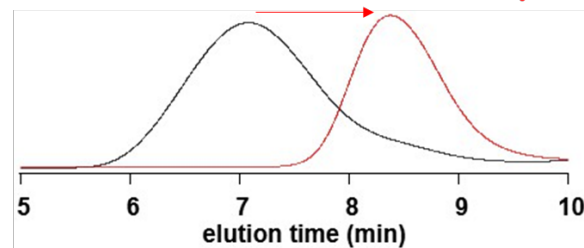

**Figure S11.** SEC traces of poly(*n*-BA)s synthesized at 6.7 mM cyclic-TTC concentration (black line = before aminolysis, red line = after aminolysis) and 20 mM cyclic-TTC concentration (black line = before aminolysis, red line = after aminolysis).
